# Supplementary material for: Metagenomic Characterization of the Viral Community of the South Scotia Ridge
Source: PubMed Central journal article supplement (PMC6410227; doi:10.3390/v11020095), 2019-01-24
Supplement: viruses-11-00095-s001.pdf [file viruses-11-00095-s001.pdf]

**Table S1.** Details of the sampling sites where the viral metagenomes have been collected in the South Scotia Ridge

| Parameter     | D39s        | DA4s        | DA4b        |
|---------------|-------------|-------------|-------------|
| Sampling data | 31 Dec 2016 | 28 Dec 2016 | 28 Dec 2016 |
| Sample volume | 300L        | 200L        | 200L        |
| Latitude      | 60°59'S     | 61°19'S     | 61°19'      |
| Longitude     | 48°47'W     | 54°7'W      | 54°7'       |
| Depth         | 0m          | 0m          | 521m        |
| Salinity (‰)  | 34.37       | 34.42       | 34.5        |
| Temperature   | -0.04°C     | -0.15°C     | -0.57°C     |

**Table S2.** General statistics of the genes annotation of the three SSR viromes

| Genes                          | 3300028548(D39s) |                | 3300028550(DA4s) |                | 3300028925(DA4b) |                |
|--------------------------------|------------------|----------------|------------------|----------------|------------------|----------------|
|                                | Number           | % of Assembled | Number           | % of Assembled | Number           | % of Assembled |
| <b>RNA genes</b>               | 3842             | 0.85           | 3235             | 0.94           | 5295             | 0.67           |
| rRNA genes                     | 556              | 0.12           | 460              | 0.13           | 449              | 0.06           |
| 5S rRNA                        | 146              | 0.03           | 64               | 0.02           | 94               | 0.01           |
| 16S rRNA                       | 84               | 0.02           | 79               | 0.02           | 98               | 0.01           |
| 18S rRNA                       | 105              | 0.02           | 111              | 0.03           | 49               | 0.01           |
| 23S rRNA                       | 90               | 0.02           | 81               | 0.02           | 128              | 0.02           |
| 28S rRNA                       | 131              | 0.03           | 125              | 0.04           | 80               | 0.01           |
| tRNA genes                     | 3286             | 0.73           | 2775             | 0.81           | 4846             | 0.62           |
| <b>Protein coding genes</b>    | 445825           | 99.15          | 340505           | 99.06          | 781899           | 99.33          |
| Genes with Function Prediction | 106282           | 23.64          | 63896            | 18.59          | 152327           | 19.35          |
| COG Categories                 | 76213            | 16.95          | 40835            | 11.88          | 104018           | 13.21          |
| Pfam Categories                | 98599            | 21.93          | 57678            | 16.78          | 140226           | 17.81          |
| KEGG Orthology                 | 50973            | 11.34          | 26843            | 7.81           | 61686            | 7.84           |
| Enzymes                        | 31923            | 7.10           | 16046            | 4.67           | 38634            | 4.91           |
| MetaCyc Pathways               | 18218            | 4.05           | 8893             | 2.59           | 19020            | 2.42           |
| KEGG Categories                | 31249            | 6.95           | 16793            | 4.89           | 34757            | 4.42           |

COG, clusters of orthologous groups; KEGG, Kyoto Encyclopedia of Genes and Genomes.

**Table S3.** Most represented viral genotypes among the viral hits according to complete normalized by viral genomes length and the total number of reads sequenced.

| Viral species                          | Relative abundance (%) |       |       | Host               |
|----------------------------------------|------------------------|-------|-------|--------------------|
|                                        | D39s                   | DA4s  | DA4b  |                    |
| <i>Prochlorococcus</i> phages          | 3.34                   | 2.89  | 3.68  | cyanobacteria      |
| <i>Synechococcus</i> phages            | 12.05                  | 9.93  | 13.68 | cyanobacteria      |
| unclassified Cyanophage                | 3.46                   | 2.99  | 3.80  | cyanobacteria      |
| <i>Puniceispirillum</i> phage HMO-2011 | 20.70                  | 25.74 | 18.49 | SAR116             |
| <i>Pelagibacter</i> phages             | 21.71                  | 18.36 | 21.60 | SAR11              |
| <i>Pseudomonas</i> phages              | 4.16                   | 4.13  | 4.70  | <i>Pseudomonas</i> |



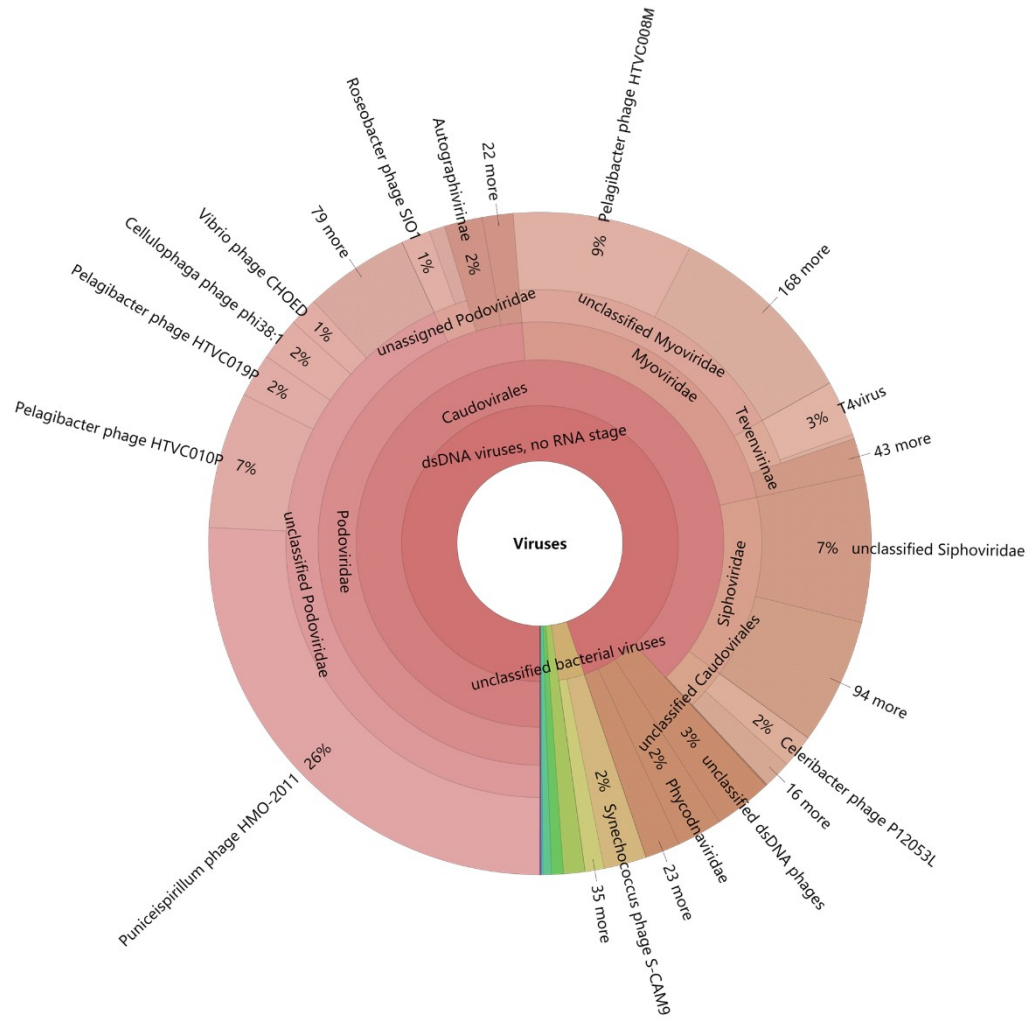

**Fig. S3** Krona chart representing taxonomic composition of the sequence reads in the DA4s from SSR surface seawater.

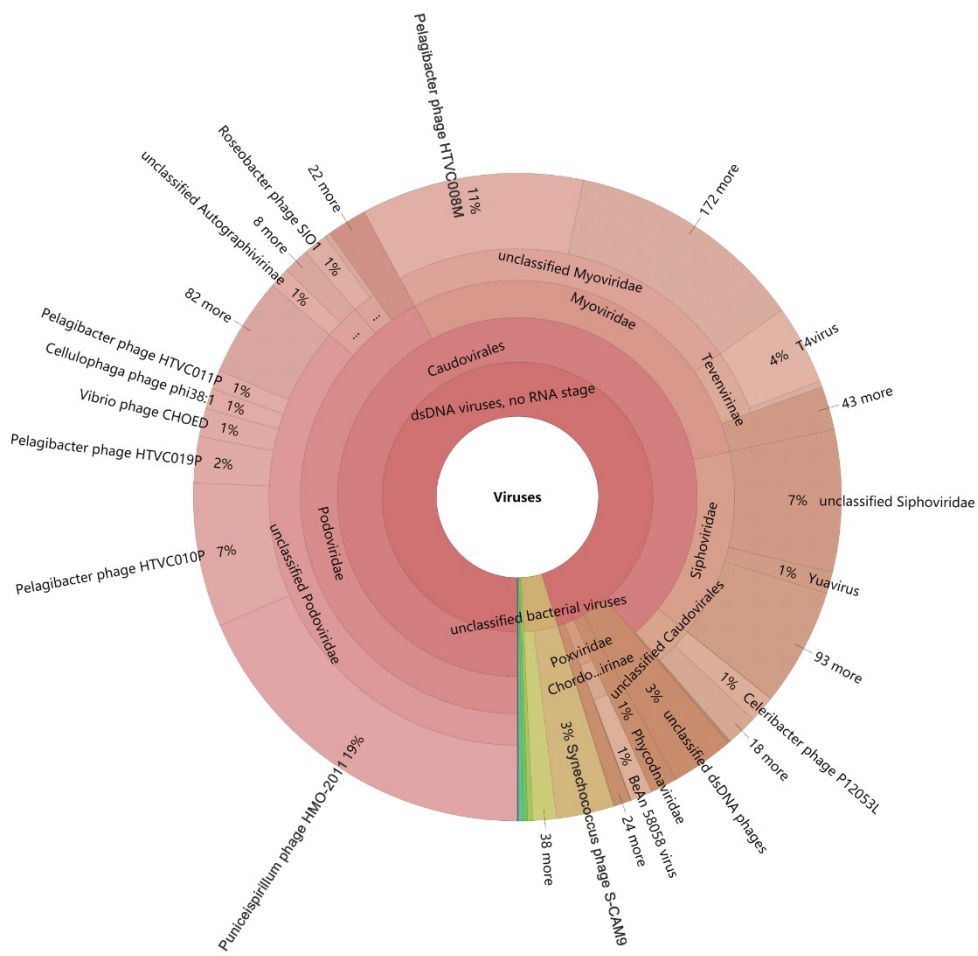

**Fig. S4** Krona chart representing taxonomic composition of the sequence reads in the D39s from SSR bottom seawater

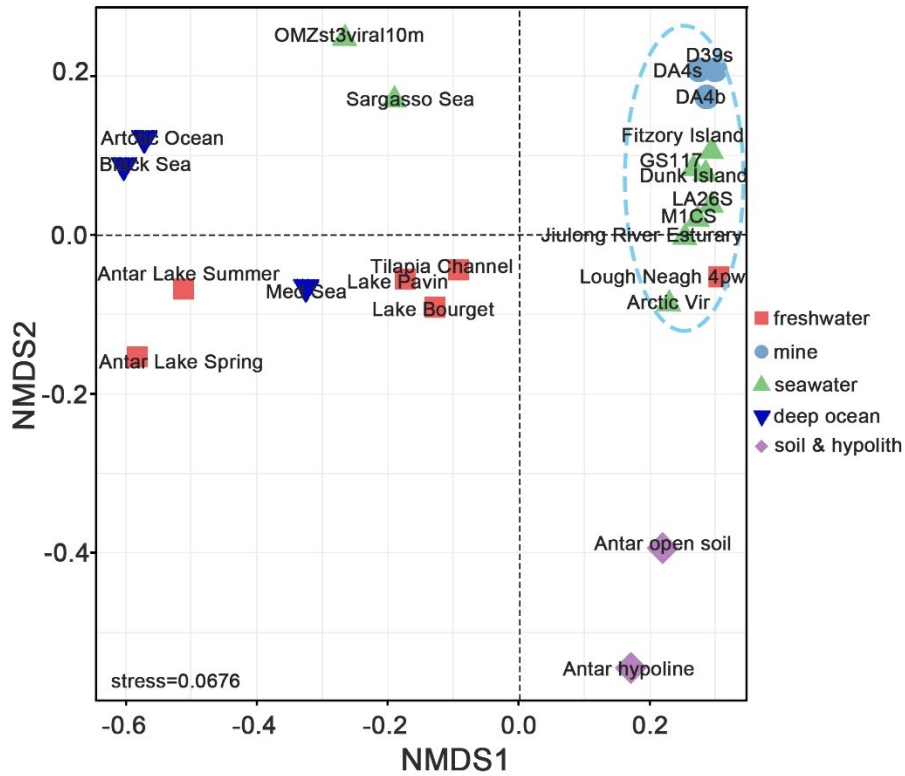

Fig. S5 Comparison viromes between SSR area and other environmental viromes depending on known taxonomic composition (stress value 6.76%, %)

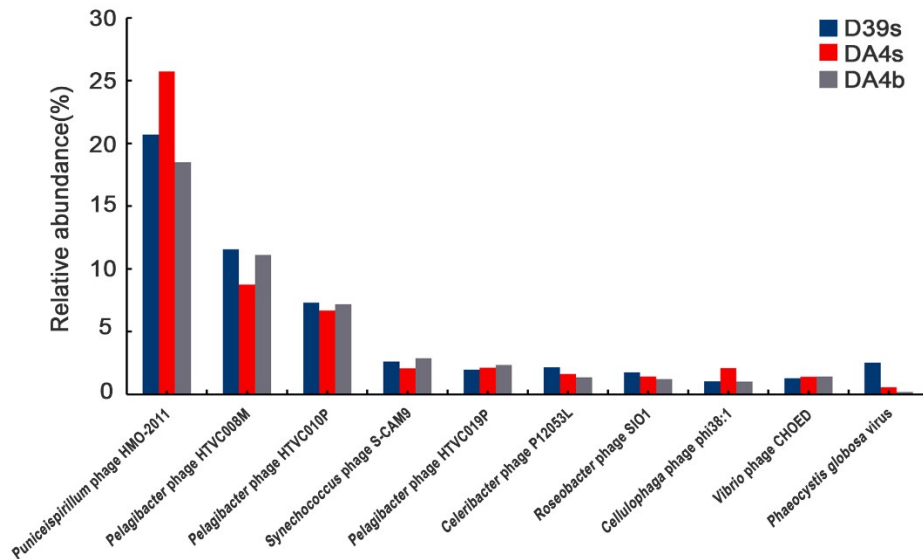

Fig. S6 Top 10 relative abundant of viral species in the three SSR viromes.
